# Supplementary material for: High-k polymer materials containing cyclic carbonate as gate dielectrics for application in low-voltage operating organic thin-film transistors
Source: Royal Society of Chemistry journal article supplement (doi:10.1039/c9tc04417e), 2019-01-01
Supplement: c9tc04417e1.pdf [file c9tc04417e1.pdf]

## Supplementary Information

### High-*k* polymer materials containing cyclic carbonate as gate dielectrics for application in low-voltage operating organic thin-film transistors

Jiawei Zou,<sup>a</sup> Shizhang Li,<sup>b</sup> He Wang,<sup>c</sup> Wei Wang,<sup>\*b</sup> Zuosen Shi,<sup>a</sup> Yuhang Jiang,<sup>a</sup> Zhanchen Cui<sup>\*a</sup> and Donghang Yan<sup>c</sup>

<sup>a</sup> State Key Laboratory of Supramolecular Structure and Materials, College of Chemistry, Jilin University, Changchun 130012, PR China

E-mail: cuizc@jlu.edu.cn; Fax: +86-431-85193423; Tel: +86-431-85168930

<sup>b</sup> State Key Laboratory on Integrated Optoelectronics, Jilin University Region, Changchun 130012, PR China

<sup>c</sup> State Key Laboratory of Polymer Physics and Chemistry, Changchun Institute of Applied Chemistry, Chinese Academy of Sciences, Changchun 130012, PR China

#### Materials

All materials such as glycidyl methacrylate (GMA), 2-(2-methoxyethoxy) ethyl methacrylate (MEEMA) and poly(ethylene glycol) dimethyl ether (PEG DME 500) were used as received. The CO<sub>2</sub> was used in a purity of 99.9%. The CaI<sub>2</sub> was used anhydrous with a purity of ≥ 99% and stored under N<sub>2</sub> conditions. 2,2-Azobisisobutyronitrile (AIBN) was recrystallized in ethanol before use. The tetrahydrofuran (THF), ethyl acetate (EA) and hexane were purified by distillation.

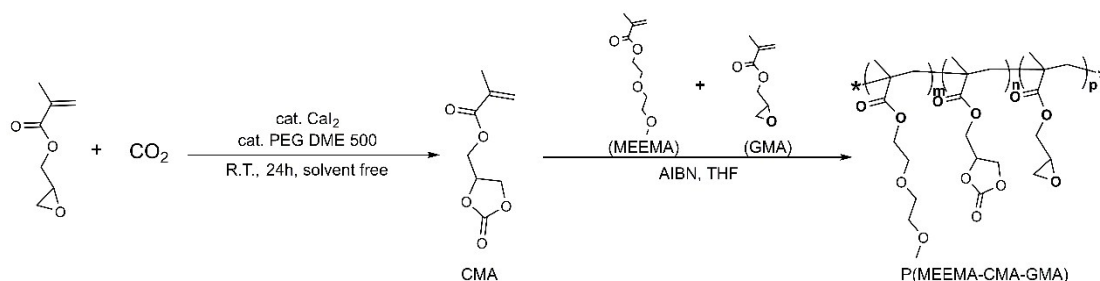

**Scheme S1.** The synthesis routes of P(MEEMA-CMA-GMA).

#### Synthesis of (2-oxo-1,3-dioxolan-4-yl)methyl methacrylate (CMA).

Compound CMA<sup>1</sup>: Glycidyl methacrylate (GMA) (28.43g, 200mmol) was added to a mixture of CaI<sub>2</sub> (2.94g, 10mmol) and poly(ethylene glycol) dimethyl ether (PEG DME 500) (5g, 10mmol) at

room temperature by bubbling CO<sub>2</sub> for 24 hours. The reaction mixture was filtered and column chromatography eluting with EA : hexane (1 : 5 v/v) was performed to purify the product obtained by removing the solvent under reduced pressure. The target compound was liquid of 27.94 g (75%).  
<sup>1</sup>H NMR (500 MHz, CDCl<sub>3</sub>, δ, ppm): 6.15-6.17 (s, 1H), 5.66-5.68 (m, 1H), 4.95-5.0 (m, 1H), 4.56-4.60 (t, 1H), 4.41-4.46 (dd, 1H), 4.32-4.37 (m, 2H), 1.95-1.97 (s, 3H).

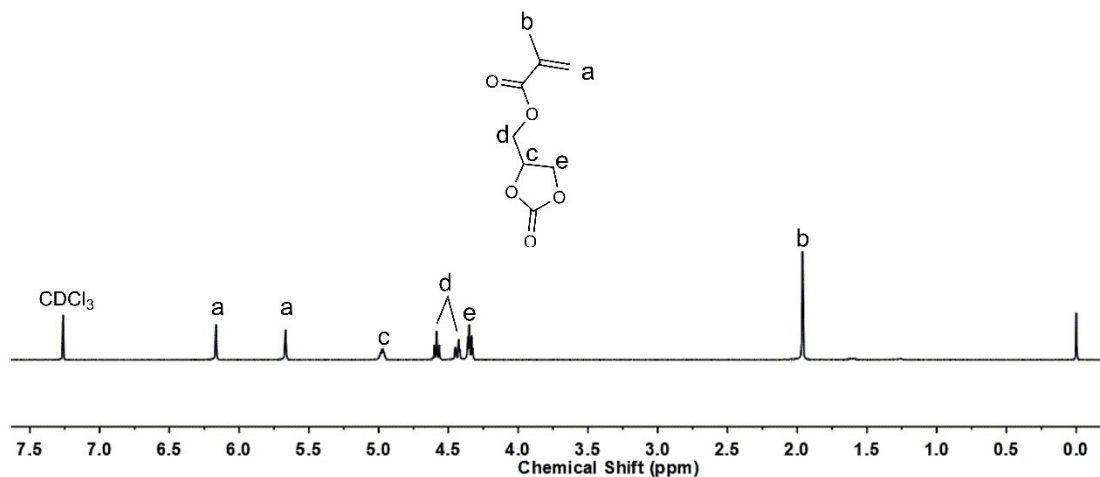

**Fig. S1.** The <sup>1</sup>H NMR spectrum of compound CMA (CDCl<sub>3</sub>, 500 MHz).

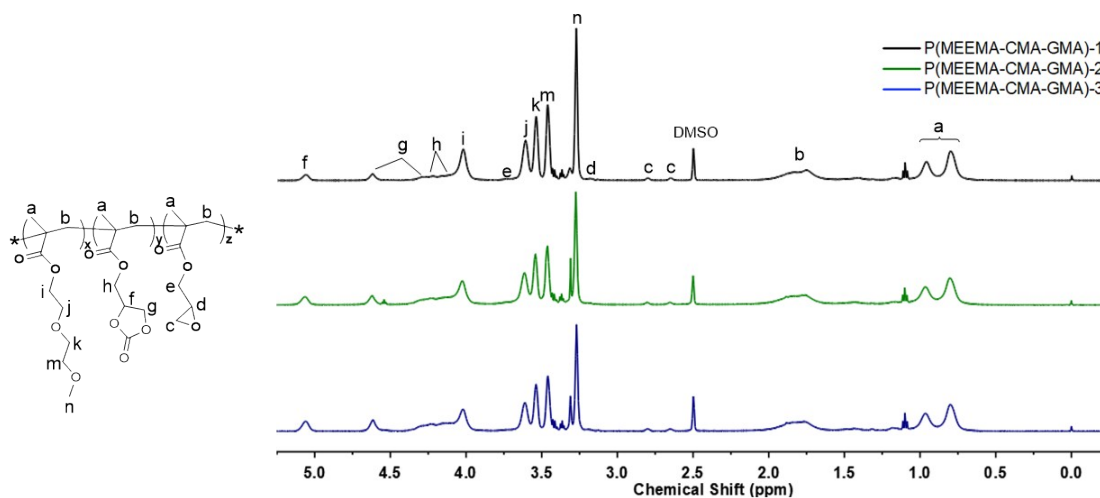

**Fig. S2.** The <sup>1</sup>H NMR spectra and structure of three copolymers (CDCl<sub>3</sub>, 500 MHz).

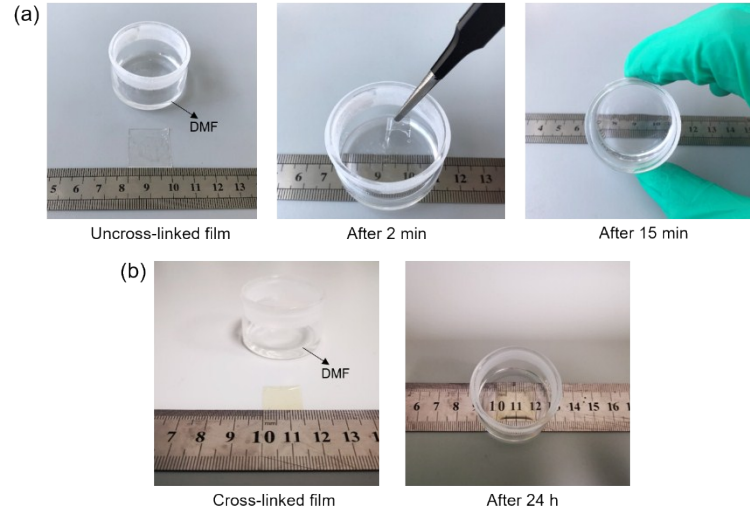

**Fig. S3.** Optical images of uncross-linked film (a) and cross-linked film (b) after soaking in DMF for different time period.

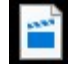

the flexibility of crosslinked film.MP4

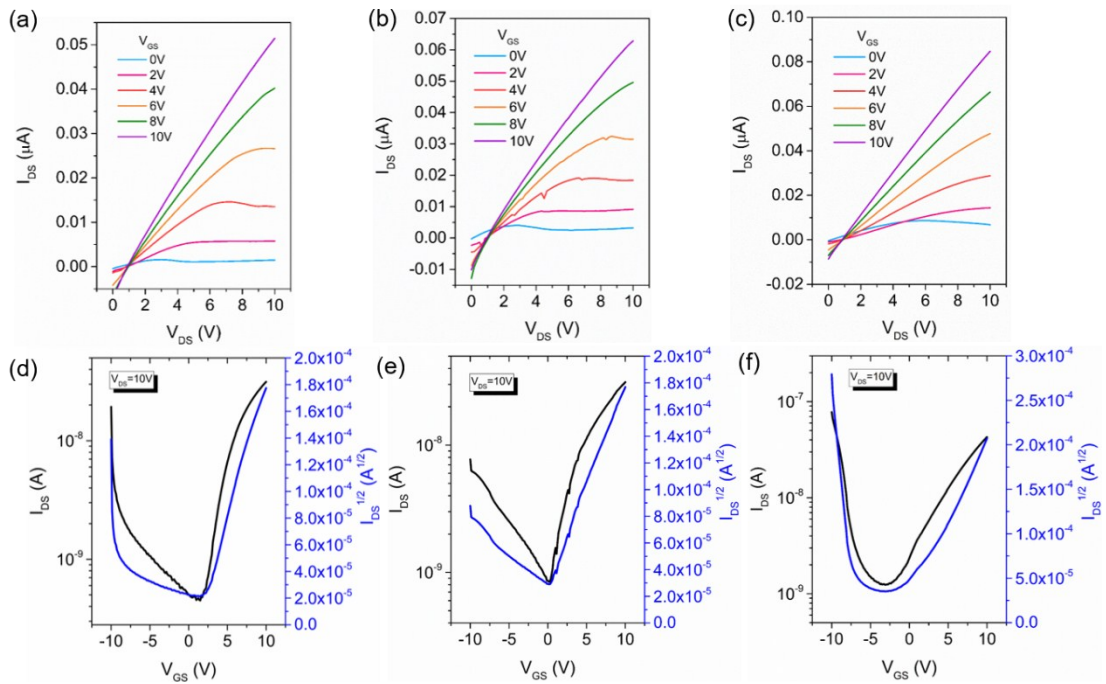

**Fig. S4.** (a), (b) and (c) Output characteristic curves and (d), (e) and (f) transfer characteristic curves of n-type  $F_{16}CuPc$  TFTs with these P(MEEMA-CMA-GMA) copolymers as the dielectric layers.

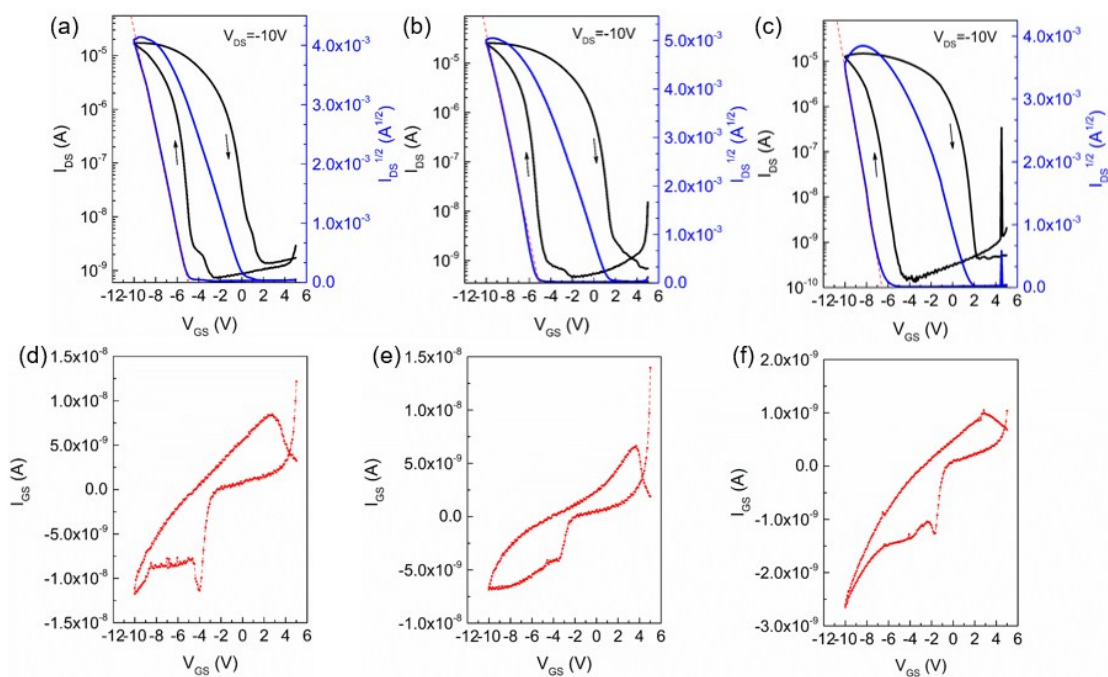

**Fig. S5.** (a), (b) and (c) transfer characteristic curves of p-type C<sub>10</sub>-DNTT TFTs with these P(MEEMA-CMA-GMA) copolymers as the dielectric layers. (d), (e) and (f) gate leakage current curves of p-type C<sub>10</sub>DNTT TFTs with these P(MEEMA-CMA-GMA) copolymers as the dielectric layers.

**Table S1.** The molar ratios of the monomers in the structures of P(MEEMA-CMA-GMA) copolymers

| Name of copolymer  | Comp. mol % |     |     |
|--------------------|-------------|-----|-----|
|                    | MEEMA       | CMA | GMA |
| P(MEEMA-CMA-GMA)-1 | 13          | 4   | 1   |
| P(MEEMA-CMA-GMA)-2 | 11          | 6   | 1   |
| P(MEEMA-CMA-GMA)-3 | 10          | 7   | 1   |

**Table S2.** Transistor parameters for F<sub>16</sub>CuPc based on P(MEEMA-CMA-GMA) copolymer dielectric layers

| OS                   | Dielectric layer   | Mobility <sup>a</sup><br>(cm <sup>2</sup> V <sup>-1</sup> s <sup>-1</sup> ) | On/off ratio <sup>b</sup> | Threshold voltage <sup>c</sup><br>(V) |
|----------------------|--------------------|-----------------------------------------------------------------------------|---------------------------|---------------------------------------|
| F <sub>16</sub> CuPc | P(MEEMA-CMA-GMA)-1 | 0.0051                                                                      | 2.22 × 10 <sup>2</sup>    | 2                                     |
|                      | P(MEEMA-CMA-GMA)-2 | 0.0024                                                                      | 3.15 × 10 <sup>2</sup>    | -1                                    |

|                        |        |                    |      |
|------------------------|--------|--------------------|------|
| P(MEEMA-CMA-<br>GMA)-3 | 0.0028 | $1.93 \times 10^4$ | -0.2 |
|------------------------|--------|--------------------|------|

<sup>a</sup>Average field-effect mobility, <sup>b</sup>average on/off ratio and <sup>c</sup>average threshold voltage of 10 OTFTs.

---

## REFERENCES

- (1) Steinbauer, J.; Werner, T. Poly(ethylene glycol)s as Ligands in Calcium-Catalyzed Cyclic Carbonate Synthesis. *ChemSusChem* **2017**, *10*, 3025-3029.
